# Supplementary material for: Inhibition of myocyte-specific enhancer factor 2A improved diabetic cardiac fibrosis partially by regulating endothelial-to-mesenchymal transition
Source: PubMed Central journal article supplement (PMC5058738; doi:10.18632/oncotarget.8842), 2016-04-20
Supplement: oncotarget-07-31053-s001.pdf [file oncotarget-07-31053-s001.pdf]

## SUPPLEMENTARY FIGURES AND TABLE

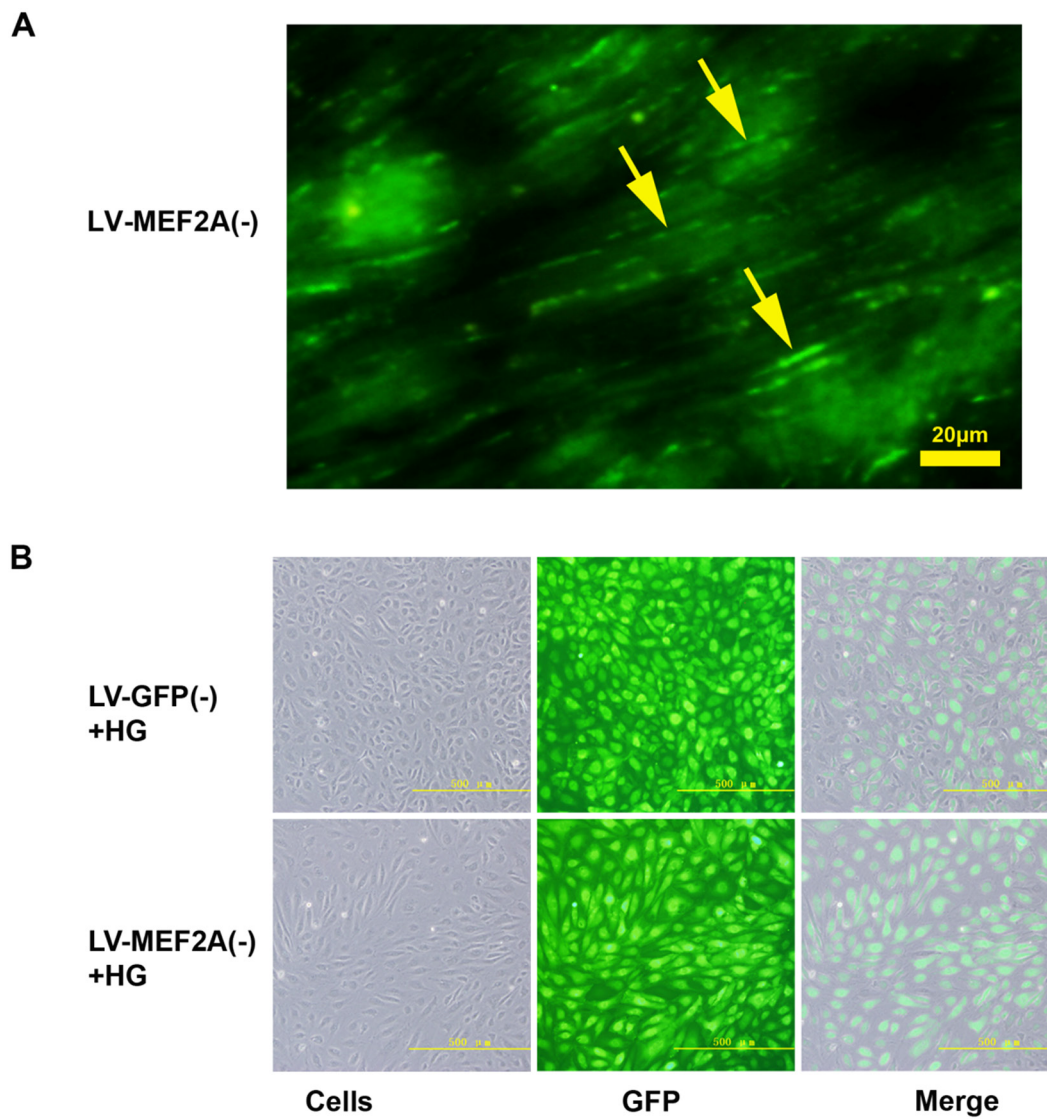

**Supplementary Figure S1: Fluorescence microscopy of GFP-labeled transfection efficiency in mouse myocardial tissue and HUVECs.** **A.** GFP immunofluorescence images of mouse myocardial tissue in MEF2A knockdown group. The arrowhead points indicate locations at which GFP is expressed (scale bars=20 $\mu$ m); **B.** Representative photograph of GFP-labeled scramble transfection efficiency of MEF2A knockdown in HUVECs (scale bars =500 $\mu$ m).

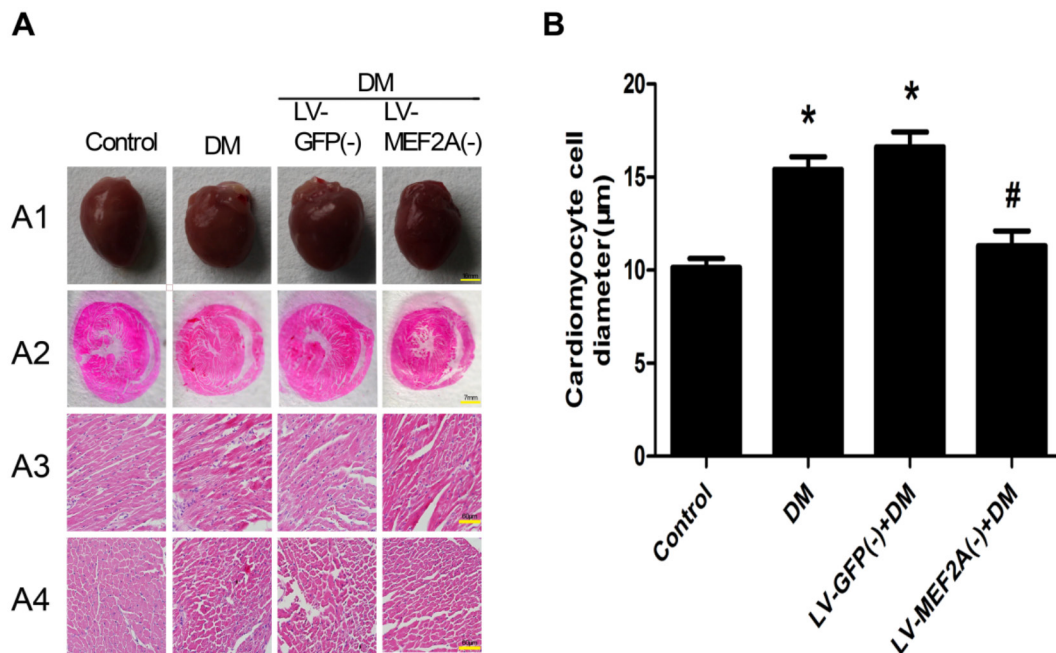

**Supplementary Figure S2: Myocardial pathology features and cardiomyocytes cell diameter in control group and STZ-induced diabetes group.** **A.** Myocardial pathology features. (A1) Heart size (scale bars =60mm); (A2) Cardiac histological cross-sectional anatomy at the papillary muscle level (scale bars = 7mm); (A3) Cardiac hematoxylin and eosin staining (H&E) of left ventricular (LV) longitudinal sections (scale bar=60 μm); (A4) Cardiac H&E staining of LV transverse sections (scale bar = 60 μm); **B.** Quantitative analysis of cardiomyocyte cell diameter. Data are expressed as the mean±SEM; n=6 to 8 mice for each group; \*p< 0.05 vs. control group, #p< 0.05 vs. vehicle treatment group.

**Supplementary Table S1: PCR primer sequences**

| Gene              | Sense                        | Antisense                   |
|-------------------|------------------------------|-----------------------------|
| Human MEF2A       | 5'-AACCCAGGGAGTTCCTGCTGGT-3' | 5'-TGTGAGGTCTGTAGTGCTCAA-3' |
| Mouse MEF2A       | 5'-GGAGCTGGAATAGTCCTGTGG-3'  | 5'-GGGAGCTTTGTAGGCATGACTT-3 |
| Human VE-Cadherin | 5'-AAGCGTGAGTCGCAAGAATG-3'   | 5'-TCTCCAGGTTTTTCGCCAGTG-3' |
| Human CD31        | 5'-AACAGTGTGACATGAAGAGCC-3'  | 5'-AACAGTGTGACATGAAGAGCC-3' |
| Human FSP-1       | 5'-GATGAGCAACTTGGACAGCAA-3'  | 5'-CTGGGCTGCTTATCTGGGAAG-3' |
| Human α-SMA       | 5'-CACAAATGTGCGACGAAGACG-3'  | 5'-CTCTCTTGTCTGAGCCTCG-3'   |
| Human β-actin     | 5'-GAGCTACGAGCTGCCTGACG-3'   | 5'-CCTAGAAGCATTTCGGTGG-3'   |
| Mouse β-actin     | 5'-CACTGTGCCATCTACGA-3'      | 5'-GTAGTCTGTCAGGTCCCG -3'   |
